# Supplementary material
Source: MDPI journal article supplement (https://www.mdpi.com/2073-4344/11/3/399)
Supplement: s1 [file s1]

## Supplementary Materials

### Optical management of CQD/AgNP@SiNW arrays with highly efficient capability of dye degradation

Po-Hsuan Hsiao<sup>1</sup>, Sasimontra Timjan<sup>1</sup>, Kuan-Yi Kuo<sup>1</sup>, Joon Ching Juan<sup>2</sup>, and Chia-Yun Chen<sup>1,3\*</sup>

<sup>1</sup>Department of Materials Science and Engineering, National Cheng Kung University, Tainan 70101, Taiwan

<sup>2</sup>Nanotechnology & Catalysis Research Centre, Institute for Advanced Studies, University of Malaya, 50603 Kuala Lumpur, Malaysia

<sup>3</sup>Hierarchical Green-Energy Materials (Hi-GEM) Research Center, National Cheng Kung University, Tainan 70101, Taiwan

S1 Measurement of time-dependent current-voltage (I-V) curves of various SiNW-based samples

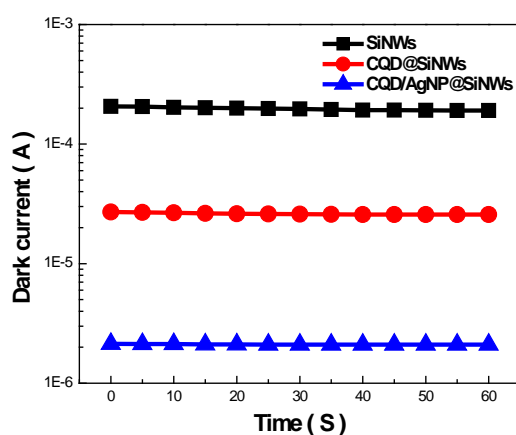

Fig. S1 Time-dependent I-V curves of sole SiNW, CQD@SiNW and CQD/AgNP@SiNW arrays. The results indicate that no obvious hysteresis in the I-V characteristics can be found.

S2 Light-absorption spectra of MB dyes changed with time in the presence of CQD/AgNP@SiNW arrays

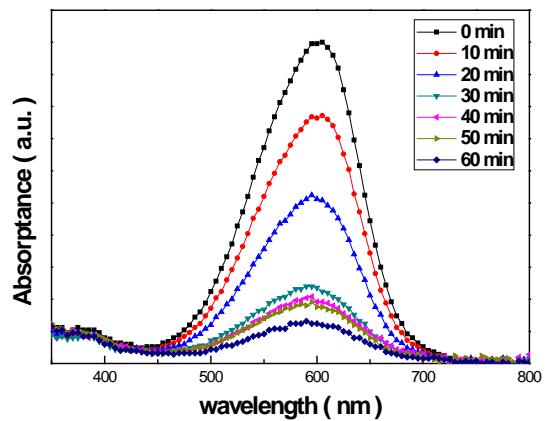

Fig. S2 Light-absorption spectra of MB dyes in the presence of CQD/AgNP@SiNW arrays after experiencing light illuminations.
